# Supplementary material
Source: PubMed Central journal article supplement (PMC1895956)
Supplement: pnas_0611462104_1.pdf [file pnas_0611462104_1.pdf]

Table 2. Selected species pairs in the comparison of density–area relationships for moth species between the United States and United Kingdom data sets (SI Tables 4 and 5)

| <b>Family</b> | <b>United States species</b>               | <b>United Kingdom species</b> |
|---------------|--------------------------------------------|-------------------------------|
| Arctiidae     | <i>Halysidota tessellaris</i>              | <i>Calliteara pudibunda</i>   |
| Arctiidae     | <i>Hyphantria cunea</i>                    | <i>Euproctis similis</i>      |
| Arctiidae     | <i>Spilosoma virginica</i>                 | <i>Spilosoma luteum</i>       |
| Geometridae   | <i>Ennomos subsignaria</i>                 | <i>Ennomos alniaria</i>       |
| Geometridae   | <i>Eulithis diversilineata</i>             | <i>Eulithis pyraliata</i>     |
| Geometridae   | <i>Eupithecia miserulata</i>               | <i>Eupithecia assimilata</i>  |
| Geometridae   | <i>Semiothisa quadrinotaria</i>            | <i>Semiothisa liturata</i>    |
| Lasiocampidae | <i>Malacosoma disstria</i>                 | <i>Trichura crataegi</i>      |
| Noctuidae     | <i>Abagrotis alternata</i>                 | <i>Xestia triangulum</i>      |
| Noctuidae     | <i>Acronicta ovata</i>                     | <i>Acronicta psi</i>          |
| Noctuidae     | <i>Allagrapha aeria</i>                    | <i>Autographa gamma</i>       |
| Noctuidae     | <i>Feltia herelis</i>                      | <i>Agrotis puta</i>           |
| Noctuidae     | <i>Ochropleura implecta (=plecta)*</i>     | <i>Ochropleura plecta</i>     |
| Noctuidae     | <i>Polygrammate hebraeicum</i>             | <i>Xanthia togata</i>         |
| Noctuidae     | <i>Pseudalaetia (=Mythimna) unipuncta*</i> | <i>Mythimna impura</i>        |
| Noctuidae     | <i>Pseudorthodes vecors</i>                | <i>Apamea sordens</i>         |
| Noctuidae     | <i>Tarachidia erastrioides</i>             | <i>Eremobia ochroleuca</i>    |
| Noctuidae     | <i>Xestia dolosa</i>                       | <i>Xestia c-nigrum</i>        |
| Notodontidae  | <i>Datana ministra</i>                     | <i>Phalera bucephala</i>      |
| Notodontidae  | <i>Lochmaeus bilineata</i>                 | <i>Pterostoma palpina</i>     |
| Notodontidae  | <i>Peridea angulosa</i>                    | <i>Ptilodon capucina</i>      |

\*Following taxonomic revisions in ref. 1.

#### Reference

1. Poole (1989) in *Lepidopterorum Catalogue*, ed Brill EJ (Leiden, New York), Fascicle 118, parts 1–3.
