# Supplementary material
Source: PubMed Central journal article supplement (PMC1895956)
Supplement: pnas_0611462104_3.pdf [file pnas_0611462104_3.pdf]

Table 4. Density–area relationships for moth species in the U.S. data set, estimated either from the total data set ( $DAR_{\text{slope 1}}$ ) or from a reduced data set that excluded small patches with zero density ( $DAR_{\text{slope 2}}$ )

| Family       | Species*                         | Main habitat <sup>†</sup> | Wing span <sup>‡</sup> | $DAR_{\text{slope 1}}$ (SE) <sup>§</sup> | $DAR_{\text{slope 2}}$ (SE) <sup>§</sup> |
|--------------|----------------------------------|---------------------------|------------------------|------------------------------------------|------------------------------------------|
| Arctiidae    | <i>Cisseps fulvicollis</i>       | Open                      | 33                     | −0.06 (0.27)                             | −0.06 (0.27)                             |
| Arctiidae    | <i>Clemensia albata</i>          | Forest/Edge               | 20                     | 0.29 (0.09)                              | 0.29 (0.09)                              |
| Arctiidae    | <i>Crambidia pallida</i>         | Forest/Edge               | 22                     | −0.03 (0.12)                             | −0.03 (0.12)                             |
| Arctiidae    | <i>Estigeme acrea</i>            | Open                      | 56.5                   | −0.10 (0.13)                             | −0.10 (0.13)                             |
| Arctiidae    | <i>Halysidota tessellaris</i>    | Forest                    | 42.5                   | 0.36 (0.13)                              | 0.36 (0.13)                              |
| Arctiidae    | <i>Haploa lecontei</i>           | Open/Edge                 | 43                     | 0.14 (0.18)                              | 0.14 (0.18)                              |
| Arctiidae    | <i>Holomelina ferruginosa</i>    | Open                      | 27.5                   | 0.27 (0.15)                              | 0.27 (0.15)                              |
| Arctiidae    | <i>Holomelina opella</i>         | Open                      | 28                     | −0.15 (0.19)                             | −0.15 (0.19)                             |
| Arctiidae    | <i>Hyphantria cunea</i>          | Forest/Edge               | 32                     | −0.04 (0.26)                             | −0.04 (0.26)                             |
| Arctiidae    | <i>Hypoprepia fucosa</i>         | Forest/Edge               | 30                     | −0.06 (0.12)                             | −0.06 (0.12)                             |
| Arctiidae    | <i>Lophocampa caryae</i>         | Forest                    | 46                     | 0.30 (0.32)                              | 0.30 (0.32)                              |
| Arctiidae    | <i>Pyrrharctia isabella</i>      | Open                      | 55                     | −0.27 (0.16)                             | −0.27 (0.16)                             |
| Arctiidae    | <i>Spilosoma virginica</i>       | Open                      | 42                     | 0.21 (0.10)                              | 0.21 (0.10)                              |
| Epiplemlidae | <i>Calledapteryx dryopterata</i> | Forest                    | 20                     | 0.26 (0.13)                              | 0.26 (0.13)                              |
| Geometridae  | <i>Anavitrinella pampinaria</i>  | Forest/Edge               | 28.5                   | 0.07 (0.08)                              | 0.07 (0.08)                              |
| Geometridae  | <i>Campaea perlata</i>           | Forest/Edge               | 39.5                   | 0.17 (0.15)                              | 0.17 (0.15)                              |
| Geometridae  | <i>Ennomos subsignaria</i>       | Forest/Edge               | 36                     | −0.05 (0.23)                             | −0.05 (0.23)                             |
| Geometridae  | <i>Eubaphe mendica</i>           | Forest/Edge               | 25.5                   | 0.04 (0.16)                              | 0.04 (0.16)                              |
| Geometridae  | <i>Euchlaena irraria</i>         | Forest/Edge               | 42.5                   | 0.02 (0.16)                              | 0.02 (0.16)                              |
| Geometridae  | <i>Eulithis diversilineata</i>   | Forest                    | 30.5                   | −0.29 (0.14)                             | −0.29 (0.14)                             |
| Geometridae  | <i>Eupithecia miserulata</i>     | Open/Edge                 | 16                     | −0.03 (0.11)                             | −0.03 (0.11)                             |
| Geometridae  | <i>Heterophelps refusaria</i>    | Forest                    | 26.5                   | −0.45 (0.30)                             | −0.45 (0.30)                             |
| Geometridae  | <i>Heterophelps triguttata</i>   | Forest                    | 21                     | 0.27 (0.17)                              | 0.27 (0.17)                              |
| Geometridae  | <i>Hydrelia inortana</i>         | Forest                    | 19.5                   | 0.30 (0.12)                              | 0.30 (0.12)                              |
| Geometridae  | <i>Hypagirtis unipunctata</i>    | Forest/Edge               | 33.5                   | 0.17 (0.07)                              | 0.17 (0.07)                              |
| Geometridae  | <i>Iridopsis larvaria</i>        | Forest/Edge               | 31                     | −0.09 (0.14)                             | −0.09 (0.14)                             |
| Geometridae  | <i>Itame pustularia</i>          | Forest                    | 22.5                   | 0.67 (0.42)                              | 0.67 (0.42)                              |

| <b>Family</b> | <b>Species*</b>                  | <b>Main habitat<sup>†</sup></b> | <b>Wing span<sup>‡</sup></b> | <b>DAR<sub>slope 1</sub> (SE)<sup>§</sup></b> | <b>DAR<sub>slope 2</sub> (SE)<sup>§</sup></b> |
|---------------|----------------------------------|---------------------------------|------------------------------|-----------------------------------------------|-----------------------------------------------|
| Geometridae   | <i>Lambdina pellucidaria</i>     | Forest/Edge                     | 34.5                         | 0.20 (0.20)                                   | 0.20 (0.20)                                   |
| Geometridae   | <i>Lytrosis unitaria</i>         | Forest                          | 51.5                         | 0.24 (0.16)                                   | 0.24 (0.16)                                   |
| Geometridae   | <i>Melanolophia canadaria</i>    | Forest/Edge                     | 32                           | -0.10 (0.13)                                  | -0.10 (0.13)                                  |
| Geometridae   | <i>Mellilla xanthometata</i>     | Forest/Edge                     | 18.5                         | 0.13 (0.20)                                   | 0.13 (0.20)                                   |
| Geometridae   | <i>Metarranthis hypochraria</i>  | Forest/Edge                     | 37.5                         | 0.90 (0.32)                                   | 0.51 (0.48)                                   |
| Geometridae   | <i>Nematocampa resistaria</i>    | Generalist                      | 22                           | 0.11 (0.15)                                   | 0.10 (0.15)                                   |
| Geometridae   | <i>Orthonama centrostrigaria</i> | Open/Edge                       | 20                           | 0.02 (0.15)                                   | 0.02 (0.15)                                   |
| Geometridae   | <i>Orthonama obstipata</i>       | Open                            | 18.5                         | -0.18 (0.16)                                  | -0.21 (0.17)                                  |
| Geometridae   | <i>Pero honestaria</i>           | Forest/Edge                     | 35                           | -0.29 (0.26)                                  | -0.56 (0.31)                                  |
| Geometridae   | <i>Platylene olyzonaria</i>      | Forest/Edge                     | 22                           | 0.54 (0.16)                                   | 0.41 (0.18)                                   |
| Geometridae   | <i>Pleuroprucha insulsaria</i>   | Generalist                      | 14                           | 0.17 (0.17)                                   | 0.17 (0.17)                                   |
| Geometridae   | <i>Probole amicaria</i>          | Forest/Edge                     | 28.5                         | 0.11 (0.20)                                   | 0.11 (0.20)                                   |
| Geometridae   | <i>Scopula limboundata</i>       | Generalist                      | 25                           | -0.04 (0.11)                                  | -0.04 (0.11)                                  |
| Geometridae   | <i>Semiothisa aemulataria</i>    | Forest/Edge                     | 24                           | 0.25 (0.10)                                   | 0.25 (0.10)                                   |
| Geometridae   | <i>Semiothisa bisignata</i>      | Forest                          | 24                           | 0.41 (0.55)                                   |                                               |
| Geometridae   | <i>Semiothisa fassinotata</i>    | Forest                          | 23.5                         | 0.47 (0.23)                                   | 0.47 (0.23)                                   |
| Geometridae   | <i>Semiothisa multilineata</i>   | Forest/Edge                     | 24.5                         | 0.81 (0.26)                                   | 0.33 (0.44)                                   |
| Geometridae   | <i>Semiothisa ocellinata</i>     | Forest/Edge                     | 24                           | -0.15 (0.19)                                  | -0.15 (0.19)                                  |
| Geometridae   | <i>Semiothisa quadrinotaria</i>  | Forest                          | 24.5                         | 0.18 (0.37)                                   | 0.18 (0.37)                                   |
| Geometridae   | <i>Sicya macularia</i>           | Forest                          | 29.5                         | 0.23 (0.14)                                   | 0.23 (0.14)                                   |
| Geometridae   | <i>Xanthotype urticaria</i>      | Open/Edge                       | 35                           | -0.20 (0.15)                                  | -0.20 (0.15)                                  |
| Lasiocampidae | <i>Malacosoma americanum</i>     | Forest/Edge                     | 33                           | -0.21 (0.08)                                  | -0.21 (0.08)                                  |
| Lasiocampidae | <i>Malacosoma disstria</i>       | Forest/Edge                     | 30                           | 0.28 (0.15)                                   | 0.28 (0.15)                                   |
| Limacodidae   | <i>Euclea delphinii</i>          | Forest/Edge                     | 25                           | 0.35 (0.34)                                   | 0.27 (0.37)                                   |
| Limacodidae   | <i>Lithacodes fasciola</i>       | Forest/Edge                     | 21.5                         | -0.15 (0.18)                                  | -0.21 (0.19)                                  |
| Limacodidae   | <i>Packardia elegans</i>         | Forest                          | 20                           | -0.39 (0.23)                                  | -0.39 (0.23)                                  |
| Limacodidae   | <i>Packardia geminata</i>        | Forest                          | 21                           | 0.73 (0.42)                                   | -0.31 (0.72)                                  |
| Limacodidae   | <i>Tortricidia flexuosa</i>      | Forest                          | 20                           | 0.35 (0.20)                                   | 0.27 (0.21)                                   |
| Limacodidae   | <i>Tortricidia testacea</i>      | Forest                          | 20.5                         | 0.08 (0.19)                                   | 0.08 (0.19)                                   |
| Lymantriidae  | <i>Dasychira obliquata</i>       | Forest/Edge                     | 45                           | 0.46 (0.26)                                   | 0.25 (0.32)                                   |

| <b>Family</b> | <b>Species*</b>                | <b>Main habitat<sup>†</sup></b> | <b>Wing span<sup>‡</sup></b> | <b>DAR<sub>slope 1</sub> (SE)<sup>§</sup></b> | <b>DAR<sub>slope 2</sub> (SE)<sup>§</sup></b> |
|---------------|--------------------------------|---------------------------------|------------------------------|-----------------------------------------------|-----------------------------------------------|
| Lymantriidae  | <i>Dasychira vagans</i>        | Forest/Edge                     | 51.5                         | 0.12 (0.23)                                   | 0.12 (0.23)                                   |
| Megalopigidae | <i>Lagoa crispata</i>          | Forest                          | 32.5                         | 0.58 (0.36)                                   | 0.41 (0.46)                                   |
| Noctuidae     | <i>Abagrotis alternata</i>     | Generalist                      | 38.5                         | 0.16 (0.20)                                   | -0.08 (0.19)                                  |
| Noctuidae     | <i>Acronicta inclara</i>       | Forest/Edge                     | 32                           | 0.49 (0.35)                                   | -0.02 (0.55)                                  |
| Noctuidae     | <i>Acronicta ovata</i>         | Forest                          | 31.5                         | 0.35 (0.32)                                   | 0.35 (0.32)                                   |
| Noctuidae     | <i>Agrotis ipsilon</i>         | Generalist                      | 27.5                         | -0.22 (0.15)                                  | -0.22 (0.15)                                  |
| Noctuidae     | <i>Allagrapha aerea</i>        | Generalist                      | 35                           | -0.10 (0.24)                                  | -0.10 (0.24)                                  |
| Noctuidae     | <i>Allothria elonympha</i>     | Forest/Edge                     | 39                           | 0.28 (0.28)                                   | 0.36 (0.47)                                   |
| Noctuidae     | <i>Anorthodes tarda</i>        | Generalist                      | 30                           | -0.05 (0.15)                                  | -0.05 (0.15)                                  |
| Noctuidae     | <i>Baileya australis</i>       | Forest/Edge                     | 32                           | 0.18 (0.20)                                   | 0.18 (0.20)                                   |
| Noctuidae     | <i>Baileya ophthalmica</i>     | Forest                          | 27.5                         | 0.11 (0.41)                                   | -0.15 (0.48)                                  |
| Noctuidae     | <i>Bleptina caradrinalis</i>   | Forest                          | 27                           | 0.47 (0.30)                                   | 0.47 (0.30)                                   |
| Noctuidae     | <i>Bomolocha baltimoralis</i>  | Forest/Edge                     | 29                           | 0.35 (0.31)                                   | 0.35 (0.31)                                   |
| Noctuidae     | <i>Bomolocia madefactalis</i>  | Forest/Edge                     | 28.5                         | 0.00 (0.26)                                   | 0.00 (0.26)                                   |
| Noctuidae     | <i>Catocala paleogamma</i>     | Forest                          | 65                           | 0.75 (0.31)                                   | -0.04 (0.50)                                  |
| Noctuidae     | <i>Chytolita morbidalis</i>    | Forest/Edge                     | 32                           | 0.14 (0.35)                                   | 0.14 (0.35)                                   |
| Noctuidae     | <i>Colocasia flavicornis</i>   | Forest/Edge                     | 46                           | 0.48 (0.14)                                   | 0.48 (0.14)                                   |
| Noctuidae     | <i>Eudryas grata</i>           | Forest/Edge                     | 40.5                         | 0.23 (0.20)                                   | 0.23 (0.20)                                   |
| Noctuidae     | <i>Feltia herelis</i>          | Generalist                      | 39                           | -0.31 (0.23)                                  | -0.31 (0.23)                                  |
| Noctuidae     | <i>Galgula partita</i>         | Generalist                      | 42.5                         | -0.35 (0.15)                                  | -0.35 (0.15)                                  |
| Noctuidae     | <i>Hypenodes fractilinea</i>   | Forest/Edge                     | 12.5                         | 0.28 (0.22)                                   | 0.28 (0.22)                                   |
| Noctuidae     | <i>Hyperstrotia pervertens</i> | Forest                          | 18                           | 0.45 (0.20)                                   | 0.26 (0.24)                                   |
| Noctuidae     | <i>Idia aemula</i>             | Generalist                      | 25                           | 0.10 (0.23)                                   | 0.10 (0.23)                                   |
| Noctuidae     | <i>Idia americalis</i>         | Generalist                      | 28                           | 0.33 (0.15)                                   | 0.33 (0.15)                                   |
| Noctuidae     | <i>Idia lubricalis</i>         | Generalist                      | 30                           | 0.15 (0.17)                                   | 0.15 (0.17)                                   |
| Noctuidae     | <i>Idia scobialis</i>          | Generalist                      | 35                           | 0.53 (0.20)                                   | 0.53 (0.20)                                   |
| Noctuidae     | <i>Lacinipolia lorea</i>       | Generalist                      | 32.5                         | -0.04 (0.24)                                  | -0.38 (0.25)                                  |
| Noctuidae     | <i>Lacinipolia renigera</i>    | Generalist                      | 25.5                         | -0.48 (0.22)                                  | -0.48 (0.22)                                  |
| Noctuidae     | <i>Lascoria ambigualis</i>     | Open/Edge                       | 23                           | -0.13 (0.17)                                  | -0.13 (0.17)                                  |
| Noctuidae     | <i>Lithacodia carneola</i>     | Open/Edge                       | 32.5                         | -0.24 (0.09)                                  | -0.24 (0.09)                                  |
| Noctuidae     | <i>Lithacodia muscosula</i>    | Open/Edge                       | 22                           | -0.27 (0.10)                                  | -0.27 (0.10)                                  |

| <b>Family</b> | <b>Species*</b>                    | <b>Main habitat<sup>†</sup></b> | <b>Wing span<sup>‡</sup></b> | <b>DAR<sub>slope 1</sub> (SE)<sup>§</sup></b> | <b>DAR<sub>slope 2</sub> (SE)<sup>§</sup></b> |
|---------------|------------------------------------|---------------------------------|------------------------------|-----------------------------------------------|-----------------------------------------------|
| Noctuidae     | <i>Macrochilo absorptalis</i>      | Open/Edge                       | 23.5                         | -0.25 (0.19)                                  | -0.25 (0.19)                                  |
| Noctuidae     | <i>Nigetia formosalis</i>          | Forest/Edge                     | 18                           | 0.51 (0.23)                                   | 0.38 (0.26)                                   |
| Noctuidae     | <i>Ochropleura implecta</i>        | Open/Edge                       | 28.5                         | -0.44 (0.19)                                  | -0.44 (0.19)                                  |
| Noctuidae     | <i>Ogdoconta cinereola</i>         | Generalist                      | 33                           | -0.29 (0.20)                                  | -0.29 (0.20)                                  |
| Noctuidae     | <i>Orthodes crenulata</i>          | Open/Edge                       | 31.5                         | -0.30 (0.29)                                  | -0.30 (0.29)                                  |
| Noctuidae     | <i>Palthis asopialis</i>           | Forest/Edge                     | 20                           | -0.13 (0.10)                                  | -0.13 (0.10)                                  |
| Noctuidae     | <i>Pangrapta decoralis</i>         | Forest                          | 24                           | 0.92 (0.43)                                   | 0.85 (0.54)                                   |
| Noctuidae     | <i>Peridroma saucia</i>            | Generalist                      | 46                           | -0.10 (0.16)                                  | -0.10 (0.16)                                  |
| Noctuidae     | <i>Phalaenostola laurentioides</i> | Generalist                      | 43                           | -0.30 (0.13)                                  | -0.30 (0.13)                                  |
| Noctuidae     | <i>Plathypena scabra</i>           | Open/Edge                       | 39.5                         | -0.32 (0.18)                                  | -0.32 (0.18)                                  |
| Noctuidae     | <i>Polia detracta</i>              | Generalist                      | 55                           | 0.22 (0.18)                                   | 0.22 (0.18)                                   |
| Noctuidae     | <i>Polygrammate hebraicum</i>      | Forest                          | 31                           | 0.93 (0.26)                                   | 0.45 (0.38)                                   |
| Noctuidae     | <i>Protolampra brunneicollis</i>   | Generalist                      | 42                           | -0.11 (0.32)                                  | -0.11 (0.32)                                  |
| Noctuidae     | <i>Pseudaletia unipuncta</i>       | Generalist                      | 26.5                         | 0.03 (0.14)                                   | 0.03 (0.14)                                   |
| Noctuidae     | <i>Pseudorthodes vecors</i>        | Open                            | 28.5                         | -0.37 (0.21)                                  | -0.37 (0.21)                                  |
| Noctuidae     | <i>Renia discoloralis</i>          | Forest/Edge                     | 40                           | 0.28 (0.23)                                   | 0.20 (0.25)                                   |
| Noctuidae     | <i>Spargaloma sexpunctata</i>      | Open/Edge                       | 27                           | -0.68 (0.23)                                  | -0.68 (0.23)                                  |
| Noctuidae     | <i>Tarachidia erastrionides</i>    | Open                            | 36                           | -0.56 (0.24)                                  | -0.56 (0.24)                                  |
| Noctuidae     | <i>Thioptera nigrofimbria</i>      | Open                            | 20                           | -0.42 (0.12)                                  | -0.42 (0.12)                                  |
| Noctuidae     | <i>Xestia dolosa</i>               | Generalist                      | 34.5                         | -0.10 (0.09)                                  | -0.10 (0.09)                                  |
| Noctuidae     | <i>Zale lunata</i>                 | Forest                          | 47.5                         | -0.20 (0.31)                                  | -0.20 (0.31)                                  |
| Noctuidae     | <i>Zanclognatha cruralis</i>       | Forest/Edge                     | 29.5                         | 0.50 (0.25)                                   | 0.36 (0.30)                                   |
| Noctuidae     | <i>Zanclognatha laevigata</i>      | Forest/Edge                     | 30                           | 0.50 (0.37)                                   | 0.37 (0.43)                                   |
| Noctuidae     | <i>Zanclognatha obscuripennis</i>  | Forest/Edge                     | 16.5                         | -0.44 (0.15)                                  | -0.44 (0.15)                                  |
| Noctuidae     | <i>Zanclognatha ochreipennis</i>   | Forest/Edge                     | 56.5                         | 0.67 (0.16)                                   | 0.65 (0.14)                                   |
| Notodontidae  | <i>Datana integerrima</i>          | Forest/Edge                     | 24                           | 0.08 (0.19)                                   | -0.19 (0.20)                                  |
| Notodontidae  | <i>Datana ministra</i>             | Forest/Edge                     | 23.5                         | 0.45 (0.44)                                   | 0.40 (0.48)                                   |
| Notodontidae  | <i>Heterocampa umbrata</i>         | Forest                          | 25                           | 0.52 (0.26)                                   | 0.27 (0.32)                                   |

| Family       | Species*                          | Main habitat <sup>†</sup> | Wing span <sup>‡</sup> | DAR <sub>slope 1</sub> (SE) <sup>§</sup> | DAR <sub>slope 2</sub> (SE) <sup>§</sup> |
|--------------|-----------------------------------|---------------------------|------------------------|------------------------------------------|------------------------------------------|
| Notodontidae | <i>Lochmaeus bilineata</i>        | Forest                    | 37.5                   | 0.40 (0.13)                              | 0.40 (0.13)                              |
| Notodontidae | <i>Macrurocampa marthesia</i>     | Forest                    | 36                     | 0.73 (0.19)                              | 0.71 (0.20)                              |
| Notodontidae | <i>Nadata gibbosa</i>             | Forest                    | 22.5                   | 0.45 (0.12)                              | 0.34 (0.12)                              |
| Notodontidae | <i>Oligocentra lignicolor</i>     | Forest                    | 24.5                   | 1.11 (0.33)                              | 1.07 (0.41)                              |
| Notodontidae | <i>Peridea angulosa</i>           | Forest                    | 42.5                   | 0.20 (0.11)                              | 0.08 (0.09)                              |
| Notodontidae | <i>Peridea basitriens</i>         | Forest                    | 24.5                   | 0.27 (0.10)                              | 0.27 (0.10)                              |
| Notodontidae | <i>Schizura concinna</i>          | Forest                    | 35                     | 0.84 (0.15)                              | 0.84 (0.16)                              |
| Notodontidae | <i>Schizura ipomoeae</i>          | Generalist                | 24                     | 0.37 (0.34)                              | 0.20 (0.40)                              |
| Notodontidae | <i>Symerista albifrons</i>        | Forest                    | 31.5                   | 0.66 (0.29)                              | 0.31 (0.41)                              |
| Oecophoridae | <i>Agonopteryx clemensella</i>    | Open/Edge                 | 22                     | 0.33 (0.31)                              | -0.03 (0.40)                             |
| Oecophoridae | <i>Antaeotricha leucillana</i>    | Generalist                | 29.5                   | -0.06 (0.08)                             | -0.06 (0.08)                             |
| Oecophoridae | <i>Psilocorsis quercicella</i>    | Forest                    | 42.5                   | 0.47 (0.19)                              | 0.47 (0.19)                              |
| Oecophoridae | <i>Psilocorsis reflexella</i>     | Forest/Edge               | 35                     | -0.23 (0.20)                             | -0.23 (0.20)                             |
| Pyraloidea   | <i>Aglossa cuprina</i>            | Open/Edge                 | 20                     | 0.15 (0.10)                              | 0.11 (0.10)                              |
| Pyraloidea   | <i>Blepharomastix ranalis</i>     | Open                      | 24                     | 0.22 (0.20)                              | 0.22 (0.20)                              |
| Pyraloidea   | <i>Crambus agitatellus</i>        | Open                      | 33                     | -0.31 (0.15)                             | -0.31 (0.15)                             |
| Pyraloidea   | <i>Crambus caliginosellus</i>     | Open                      | 19.5                   | -0.29 (0.11)                             | -0.29 (0.11)                             |
| Pyraloidea   | <i>Crocidophora tuberculalis</i>  | Open                      | 25.5                   | 0.04 (0.11)                              | 0.04 (0.11)                              |
| Pyraloidea   | <i>Desmia funeralis</i>           | Forest/Edge               | 20                     | 0.31 (0.12)                              | 0.31 (0.12)                              |
| Pyraloidea   | <i>Helvibotys helvialis</i>       | Open                      | 18.5                   | -0.17 (0.21)                             | -0.17 (0.21)                             |
| Pyraloidea   | <i>Herculia olinalis</i>          | Forest                    | 51.5                   | 1.04 (0.32)                              | 1.04 (0.32)                              |
| Pyraloidea   | <i>Lipocosmodes fuliginosalis</i> | Unknown                   | 18.5                   | -0.98 (0.40)                             | -0.98 (0.40)                             |
| Pyraloidea   | <i>Microcrambus elegans</i>       | Open                      | 33.5                   | -0.40 (0.12)                             | -0.40 (0.12)                             |
| Pyraloidea   | <i>Ostrinia nubilalis</i>         | Open                      | 25                     | -0.75 (0.13)                             | -0.75 (0.13)                             |
| Pyraloidea   | <i>Palpita magniferalis</i>       | Forest/Edge               | 21                     | 0.02 (0.10)                              | 0.02 (0.10)                              |
| Pyraloidea   | <i>Pantographa limata</i>         | Forest                    | 21                     | 1.13 (0.56)                              | 0.32 (1.25)                              |
| Pyraloidea   | <i>Scoparia biplagiialis</i>      | Unknown                   | 21.5                   | 0.13 (0.13)                              | 0.13 (0.13)                              |
| Pyraloidea   | <i>Synclita oblitalis</i>         | Open                      | 28.5                   | -0.06 (0.23)                             | -0.06 (0.23)                             |
| Pyraloidea   | <i>Udea rubigalis</i>             | Generalist                | 30                     | -0.15 (0.09)                             | -0.15 (0.09)                             |
| Pyraloidea   | <i>Xubida panalope</i>            | Open                      | 30.5                   | 0.07 (0.27)                              | 0.07 (0.27)                              |

| Family       | Species*                          | Main habitat <sup>†</sup> | Wing span <sup>‡</sup> | DAR <sub>slope 1</sub> (SE) <sup>§</sup> | DAR <sub>slope 2</sub> (SE) <sup>§</sup> |
|--------------|-----------------------------------|---------------------------|------------------------|------------------------------------------|------------------------------------------|
| Pyraloidea   | <i>Acrobasis juglandis</i>        | Forest/Edge               | 20                     | 0.24 (0.15)                              | 0.14 (0.16)                              |
| Pyraloidea   | <i>Acrobasis palliolella</i>      | Forest/Edge               | 28.5                   | 0.40 (0.18)                              | 0.40 (0.18)                              |
| Pyraloidea   | <i>Arta statalis</i>              | Generalist                | 32                     | 0.88 (0.36)                              | 0.80 (0.45)                              |
| Pyraloidea   | <i>Eulogia ochrifrontella</i>     | Forest                    | 39.5                   | 1.14 (0.35)                              | 0.85 (0.65)                              |
| Pyraloidea   | <i>Glyptocera consobrinella</i>   | Unknown                   | 25.5                   | 0.52 (0.28)                              | 0.26 (0.38)                              |
| Pyraloidea   | <i>Nephoteryx vetustella</i>      | Open/Edge                 | 14                     | 0.21 (0.35)                              | 0.21 (0.35)                              |
| Pyraloidea   | <i>Nephoteryx virgatella</i>      | Open/Edge                 | 20.5                   | 0.14 (0.10)                              | 0.14 (0.10)                              |
| Pyraloidea   | <i>Peoria approximella</i>        | Open/Edge                 | 35                     | 0.63 (0.38)                              | 0.63 (0.38)                              |
| Pyraloidea   | <i>Tosale oviplagalis</i>         | Forest/Edge               | 16                     | 0.17 (0.14)                              | 0.16 (0.15)                              |
| Tortricidae  | <i>Acleris chalybeana</i>         | Open                      | 27                     | -0.19 (0.20)                             | -0.40 (0.21)                             |
| Tortricidae  | <i>Ancylis laciniana</i>          | Open                      | 32                     | 0.31 (0.21)                              | 0.31 (0.21)                              |
| Tortricidae  | <i>Argyrotaenia velutinana</i>    | Generalist                | 66                     | -0.57 (0.25)                             | -0.57 (0.25)                             |
| Tortricidae  | <i>Choristoneura rosaceana</i>    | Generalist                | 39                     | -0.09 (0.12)                             | -0.09 (0.12)                             |
| Tortricidae  | <i>Coelostathma discopunctana</i> | Generalist                | 28.5                   | -0.29 (0.22)                             | -0.29 (0.22)                             |
| Tortricidae  | <i>Dichrorampha bittana</i>       | Forest/Edge               | 20                     | -0.01 (0.26)                             | -0.01 (0.26)                             |
| Tortricidae  | <i>Endothenia hebesana</i>        | Generalist                | 27.5                   | -0.42 (0.15)                             | -0.42 (0.15)                             |
| Tortricidae  | <i>Hedya ochroleucana</i>         | Forest/Edge               | 18.5                   | -0.20 (0.20)                             | -0.20 (0.20)                             |
| Tortricidae  | <i>Olethreutes inoratana</i>      | Forest                    | 24                     | 0.93 (0.31)                              | 0.93 (0.31)                              |
| Tortricidae  | <i>Olethreutes nigrana</i>        | Forest                    | 65                     | 0.34 (0.41)                              | 0.34 (0.41)                              |
| Tortricidae  | <i>Olethreutes ochrosuffusana</i> | Generalist                | 33                     | 0.00 (0.30)                              | -0.32 (0.33)                             |
| Tortricidae  | <i>Olethreutes olivaceana</i>     | Forest                    | 31                     | 0.22 (0.37)                              | 0.22 (0.37)                              |
| Tortricidae  | <i>Orthotaenia undulana</i>       | Forest                    | 47.5                   | -0.06 (0.13)                             | -0.06 (0.13)                             |
| Tortricidae  | <i>Phaneta parmatana</i>          | Open                      | 36                     | -0.64 (0.31)                             | -0.64 (0.31)                             |
| Tortricidae  | <i>Platynota idaeusalis</i>       | Open                      | 42                     | 0.09 (0.24)                              | 0.09 (0.24)                              |
| Tortricidae  | <i>Proteoteras aesculana</i>      | Generalist                | 27                     | 0.03 (0.30)                              | -0.11 (0.35)                             |
| Yponmeutidae | <i>Atteva punctella</i>           | Generalist                | 30                     | -0.31 (0.33)                             | -0.31 (0.33)                             |
| Yponmeutidae | <i>Yponmeuta multipunctella</i>   | Forest/Edge               | 38.5                   | 0.17 (0.23)                              | 0.17 (0.23)                              |

\*Nomenclature according to ref. 1.

<sup>†</sup>Data from refs. 2-6.

<sup>‡</sup>Data from ref. 7 and references therein.

<sup>§</sup>Density estimates were based on samplings during June and August 2001 to accommodate phenological variation in moth community composition. To standardize the hours of trap operation, a consistent sampling interval was used in both seasons (1930-0600 Eastern daylight time<sup>1</sup>). Because weather has a significant effect on moth flight behavior and light-trap efficiency, trapping was only performed on nights when the minimum temperature was 15.5–17.5°C, there was no precipitation, and ambient moonlight was low. We conducted three trapping rotations within each ecoregion (North Central Tillplain and Western Allegheny Plateau) during both early and late seasons. Each trapping rotation consisted of a single trap night within each forest site. On any given trap night, one cluster of three forest sites was randomly selected and one blacklight trap was placed in each site. We determined clusters *a priori* based on the spatial proximity of the sites to one another to reduce travel time during trap set-up. Within a sampling rotation, site clusters were randomly selected, so each cluster was only sampled once in a given rotation. Overall, a total of 126 samples were collected in early and late seasons combined, and despite the meteorological restrictions of sampling, we completed each full rotation of trapping in 7–9 days.

## References

1. Hodges RW, Dominick T, Davis DR, Ferguson DC, Franclemont JG, Munroe EG, Powell JA, eds (1983). Check List of the Lepidoptera of America North of Mexico (E.W. Classey and the Wedge Entomological Research Foundation, London).
  2. Forbes WTM (1923) Lepidoptera of New York and Neighboring States. Part 1: Primitive Forms (Cornell University Agricultural Experiment Station, Ithaca, NY).
  3. Forbes WTM (1948) Lepidoptera of New York and Neighboring States. Part 2: Geometridae, Lymantriidae, Sphingidae, Notodontidae (Cornell University Agricultural Experiment Station, Ithaca, NY).
  4. Covell CV (1983) Eastern Moths (Houghton Mifflin Company, Boston, MA).
  5. Miller WE (1987) Guide to the Olethreutine Moths of Midland North America (Tortricidae). Handbook 660 (United State Department of Agriculture, Washington, DC).
  6. Summerville KS, Boulware MJ, Veech JA, Crist TO (2003) *Conserv Biol* 17:1045–1057.
  7. Summerville KS, Wilson TD, Veech JA, Crist TO (2006) *Diver Distrib* 12:91–99.
-
