# Supplementary material
Source: PubMed Central journal article supplement (PMC1895956)
Supplement: pnas_0611462104_4.pdf [file pnas_0611462104_4.pdf]

Table 5. Density–area relationships for moth species in the United Kingdom data set, estimated either from the total data set ( $DAR_{\text{slope 1}}$ ) or from a reduced data set that excluded small patches with zero density ( $DAR_{\text{slope 2}}$ )

| Family      | Species                        | Main habitat* | Wing span* | $DAR_{\text{slope 1}}$ (SE) <sup>†</sup> | $DAR_{\text{slope 2}}$ (SE) <sup>†</sup> |
|-------------|--------------------------------|---------------|------------|------------------------------------------|------------------------------------------|
| Arctiidae   | <i>Calliteara pudibunda</i>    | Forest/Edge   | 35–45      | 0.87 (0.27)                              | 0.67 (0.36)                              |
| Arctiidae   | <i>Eilema lurideola</i>        | Forest/Edge   | 32–36      | −0.19 (0.17)                             | −0.19 (0.17)                             |
| Arctiidae   | <i>Euproctis similis</i>       | Forest/Edge   | 26–32      | 0.44 (0.26)                              | 0.44 (0.26)                              |
| Arctiidae   | <i>Phragmatobia fuliginosa</i> | Open          | 32–36      | −0.07 (0.40)                             | −0.07 (0.40)                             |
| Arctiidae   | <i>Spilosoma lubricipeda</i>   | Forest/Edge   | 34–40      | −0.20 (0.23)                             | −0.20 (0.23)                             |
| Arctiidae   | <i>Spilosoma luteum</i>        | Forest/Edge   | 34–40      | 0.42 (0.17)                              | 0.42 (0.17)                              |
| Drepanidae  | <i>Cilix glaucata</i>          | Edge          | 18–23      | 0.06 (0.29)                              | 0.06 (0.29)                              |
| Drepanidae  | <i>Drepana falcataria</i>      | Generalist    | 30–38      | 0.07 (0.37)                              | 0.07 (0.37)                              |
| Geometridae | <i>Abraxas grossulariata</i>   | Forest/Edge   | 38–44      | 0.72 (0.43)                              | 0.65 (0.46)                              |
| Geometridae | <i>Alcis repandata</i>         | Forest/Edge   | 38–42      | 0.33 (0.15)                              | 0.33 (0.15)                              |
| Geometridae | <i>Biston betularia</i>        | Forest/Edge   | 42–52      | 0.05 (0.42)                              | 0.05 (0.42)                              |
| Geometridae | <i>Bupalus piniaria</i>        | Forest/Edge   | 32–37      | −0.09 (0.35)                             | −0.09 (0.35)                             |
| Geometridae | <i>Cabera pusaria</i>          | Forest/Edge   | 25–28      | 0.26 (0.17)                              | 0.26 (0.17)                              |
| Geometridae | <i>Campaea margaritata</i>     | Forest/Edge   | 25–30      | 0.07 (0.22)                              | 0.07 (0.22)                              |
| Geometridae | <i>Chloroclysta citrata</i>    | Forest/Edge   | 35–48      | 0.24 (0.19)                              | 0.24 (0.19)                              |
| Geometridae | <i>Chloroclysta truncata</i>   | Forest/Edge   | 27–32      | 0.25 (0.15)                              | 0.25 (0.15)                              |
| Geometridae | <i>Chloroclystis v-ata</i>     | Generalist    | 27–32      | 0.39 (0.28)                              | 0.05 (0.34)                              |
| Geometridae | <i>Colostygia pectinataria</i> | Forest        | 23–27      | 0.59 (0.27)                              | 0.55 (0.28)                              |
| Geometridae | <i>Colotois pennaria</i>       | Forest/Edge   | 40–46      | 0.60 (0.27)                              | 0.13 (0.36)                              |
| Geometridae | <i>Crocallis elinguaris</i>    | Forest        | 38–44      | 0.02 (0.21)                              | 0.02 (0.21)                              |
| Geometridae | <i>Ecliptoptera silaceata</i>  | Forest/Edge   | 23–26      | 0.26 (0.20)                              | 0.26 (0.20)                              |
| Geometridae | <i>Ectropis bistortata</i>     | Generalist    | 30–38      | 0.48 (0.45)                              | 0.05 (0.60)                              |
| Geometridae | <i>Ennomos alniaria</i>        | Forest        | 36–42      | −0.01 (0.43)                             | −0.11 (0.46)                             |
| Geometridae | <i>Epirrhoe alternata</i>      | Forest/Edge   | 22–35      | −0.16 (0.25)                             | −0.16 (0.25)                             |
| Geometridae | <i>Epirrita dilutata</i>       | Forest/Edge   | 32–37      | 0.08 (0.26)                              | −0.12 (0.27)                             |
| Geometridae | <i>Eulithis populata</i>       | Edge/Open     | 27–32      | 0.27 (0.25)                              | 0.20 (0.26)                              |

| <b>Family</b> | <b>Species</b>                  | <b>Main habitat*</b> | <b>Wing span*</b> | <b>DAR<sub>slope 1</sub> (SE)<sup>†</sup></b> | <b>DAR<sub>slope 2</sub> (SE)<sup>†</sup></b> |
|---------------|---------------------------------|----------------------|-------------------|-----------------------------------------------|-----------------------------------------------|
| Geometridae   | <i>Eulithis pyraliata</i>       | Forest/Edge          | 28–31             | −0.04 (0.16)                                  | −0.04 (0.16)                                  |
| Geometridae   | <i>Eupithecia assimilata</i>    | Forest/Edge          | 18–19             | 0.24 (0.37)                                   | −0.48 (0.57)                                  |
| Geometridae   | <i>Eupithecia pulchellata</i>   | Forest               | 18–22             | 0.48 (0.44)                                   | 0.37 (0.48)                                   |
| Geometridae   | <i>Eupithecia subfuscata</i>    | Forest/Edge          | 17–19             | 0.09 (0.18)                                   | 0.09 (0.18)                                   |
| Geometridae   | <i>Eupithecia vulgata</i>       | Forest/Edge          | 18–20             | −0.07 (0.16)                                  | −0.07 (0.16)                                  |
| Geometridae   | <i>Hydriomena furcata</i>       | Forest/Edge          | 28–32             | 0.41 (0.18)                                   | 0.41 (0.18)                                   |
| Geometridae   | <i>Hylaea fasciaria</i>         | Forest               | 32–39             | 0.36 (0.22)                                   | 0.36 (0.22)                                   |
| Geometridae   | <i>Idaea aversata</i>           | Forest/Edge          | 26–29             | 0.27 (0.11)                                   | 0.27 (0.11)                                   |
| Geometridae   | <i>Idaea biselata</i>           | Forest/Edge          | 18–21             | 0.34 (0.21)                                   | 0.28 (0.21)                                   |
| Geometridae   | <i>Idaea dimidiata</i>          | Forest/Edge          | 15–18             | 0.13 (0.12)                                   | 0.13 (0.12)                                   |
| Geometridae   | <i>Lampropteryx suffumata</i>   | Forest               | 26–28             | 0.43 (0.20)                                   | 0.32 (0.21)                                   |
| Geometridae   | <i>Lomaspilis marginata</i>     | Forest/Edge          | 21–25             | 0.10 (0.30)                                   | −0.52 (0.42)                                  |
| Geometridae   | <i>Lycia hirtaria</i>           | Forest/Edge          | 40–46             | −0.43 (0.29)                                  | −0.43 (0.29)                                  |
| Geometridae   | <i>Odontopera bidentata</i>     | Forest/Edge          | 40–46             | 0.62 (0.23)                                   | 0.62 (0.23)                                   |
| Geometridae   | <i>Opisthograptis luteolata</i> | Forest/Edge          | 31–37             | 0.21 (0.25)                                   | 0.13 (0.27)                                   |
| Geometridae   | <i>Peribatodes rhomboidaria</i> | Forest/Edge          | 37–40             | 0.93 (0.23)                                   | 0.93 (0.23)                                   |
| Geometridae   | <i>Perizoma didymata</i>        | Generalist           | 20–22             | 0.36 (0.30)                                   | 0.13 (0.35)                                   |
| Geometridae   | <i>Petrophora chlorosata</i>    | Edge/Open            | 27–31             | 0.74 (0.25)                                   | 0.74 (0.25)                                   |
| Geometridae   | <i>Scotopteryx chenopodiata</i> | Edge/Open            | 20–33             | 0.13 (0.17)                                   | 0.13 (0.17)                                   |
| Geometridae   | <i>Selenia dentaria</i>         | Forest/Edge          | 31–42             | 0.32 (0.21)                                   | 0.32 (0.21)                                   |
| Geometridae   | <i>Semiothisa liturata</i>      | Forest/Edge          | 26–30             | 0.44 (0.34)                                   | 0.44 (0.34)                                   |
| Geometridae   | <i>Thera obeliscata</i>         | Forest               | 25–31             | 0.46 (0.18)                                   | 0.46 (0.18)                                   |
| Geometridae   | <i>Xanthorhoe ferrugata</i>     | Forest/Edge          | 19–22             | −0.22 (0.13)                                  | −0.22 (0.13)                                  |
| Geometridae   | <i>Xanthorhoe fluctuata</i>     | Forest/Edge          | 22–26             | −0.03 (0.16)                                  | −0.03 (0.16)                                  |
| Geometridae   | <i>Xanthorhoe montanata</i>     | Forest/Edge          | 26–30             | −0.35 (0.21)                                  | −0.35 (0.21)                                  |
| Hepialidae    | <i>Hepialus fusconebulosa</i>   | Forest               | 32–38             | 0.89 (0.55)                                   | 0.26 (0.31)                                   |
| Hepialidae    | <i>Hepialus lupulinus</i>       | Edge/Open            | 25–27             | 0.84 (0.46)                                   | 0.84 (0.46)                                   |
| Hepialidae    | <i>Hepialus sylvina</i>         | Open                 | 28–36             | 0.30 (0.44)                                   | 0.24 (0.48)                                   |
| Lasiocampidae | <i>Philudoria potatoaria</i>    | Generalist           | 46–54             | 0.24 (0.41)                                   | −0.46 (0.60)                                  |

| <b>Family</b> | <b>Species</b>                | <b>Main habitat*</b> | <b>Wing span*</b> | <b>DAR<sub>slope 1</sub> (SE)<sup>†</sup></b> | <b>DAR<sub>slope 2</sub> (SE)<sup>†</sup></b> |
|---------------|-------------------------------|----------------------|-------------------|-----------------------------------------------|-----------------------------------------------|
| Lasiocampidae | <i>Trichiura crataegi</i>     | Forest/Edge          | 30–34             | 0.22 (0.29)                                   | –0.09 (0.35)                                  |
| Noctuidae     | <i>Abrostola triplasia</i>    | Forest/Edge          | 28–32             | –0.01 (0.31)                                  | –0.01 (0.31)                                  |
| Noctuidae     | <i>Acronicta psi</i>          | Forest               | 33–42             | –0.37 (0.31)                                  | –0.37 (0.31)                                  |
| Noctuidae     | <i>Acronicta rumicis</i>      | Generalist           | 30–39             | 0.37 (0.40)                                   | 0.24 (0.44)                                   |
| Noctuidae     | <i>Agrochola circellaris</i>  | Forest/Edge          | 34–40             | 0.22 (0.38)                                   | 0.15 (0.41)                                   |
| Noctuidae     | <i>Agrochola helvola</i>      | Forest/Edge          | 36–42             | 0.46 (0.42)                                   | 0.27 (0.51)                                   |
| Noctuidae     | <i>Agrochola litura</i>       | Forest/Edge          | 29–34             | 0.12 (0.31)                                   | 0.12 (0.31)                                   |
| Noctuidae     | <i>Agrochola lota</i>         | Forest               | 31–36             | 0.79 (0.19)                                   | 0.55 (0.24)                                   |
| Noctuidae     | <i>Agrochola lychnidis</i>    | Forest               | 30–40             | 0.12 (0.29)                                   | –0.24 (0.35)                                  |
| Noctuidae     | <i>Agrochola macilenta</i>    | Forest               | 31–35             | 0.03 (0.30)                                   | –0.06 (0.31)                                  |
| Noctuidae     | <i>Agrotis exclamationis</i>  | Edge/Open            | 30–40             | –0.20 (0.21)                                  | –0.20 (0.21)                                  |
| Noctuidae     | <i>Agrotis puta</i>           | Open                 | 30–32             | –0.41 (0.32)                                  | –0.41 (0.32)                                  |
| Noctuidae     | <i>Agrotis segetum</i>        | Open                 | 30–40             | –0.73 (0.26)                                  | –0.73 (0.26)                                  |
| Noctuidae     | <i>Allophyes oxyacanthae</i>  | Forest/Edge          | 35–45             | –0.08 (0.19)                                  | –0.08 (0.19)                                  |
| Noctuidae     | <i>Amphipyra berbera</i>      | Forest               | 40–52             | 0.02 (0.37)                                   | 0.02 (0.37)                                   |
| Noctuidae     | <i>Amphipyra tragopoginis</i> | Edge/Open            | 33–38             | –0.05 (0.18)                                  | –0.05 (0.18)                                  |
| Noctuidae     | <i>Apamea lithoxylaea</i>     | Open                 | 44–50             | –0.03 (0.31)                                  | –0.51 (0.39)                                  |
| Noctuidae     | <i>Apamea monoglypha</i>      | Edge/Open            | 43–51             | –0.08 (0.16)                                  | –0.08 (0.16)                                  |
| Noctuidae     | <i>Apamea sordens</i>         | Open                 | 30–40             | 0.05 (0.35)                                   | –0.04 (0.37)                                  |
| Noctuidae     | <i>Autographa gamma</i>       | Generalist           | 35–40             | –0.06 (0.14)                                  | –0.06 (0.14)                                  |
| Noctuidae     | <i>Axyليا putris</i>          | Edge/Open            | 27–32             | –0.78 (0.33)                                  | –0.78 (0.33)                                  |
| Noctuidae     | <i>Caradrina clavipalpis</i>  | Edge/Open            | 28–34             | 0.13 (0.38)                                   | –0.44 (0.51)                                  |
| Noctuidae     | <i>Ceramica pisi</i>          | Generalist           | 33–39             | –0.12 (0.38)                                  | –0.12 (0.38)                                  |
| Noctuidae     | <i>Conistra vaccinii</i>      | Forest/Edge          | 30–36             | 0.42 (0.23)                                   | 0.37 (0.25)                                   |
| Noctuidae     | <i>Cosmia trapezina</i>       | Forest               | 28–33             | 0.23 (0.36)                                   | –0.07 (0.45)                                  |
| Noctuidae     | <i>Diarsia brunnea</i>        | Generalist           | 35–45             | 0.12 (0.35)                                   | –0.08 (0.40)                                  |
| Noctuidae     | <i>Diarsia mendica</i>        | Forest               | 28–35             | 0.27 (0.21)                                   | 0.27 (0.21)                                   |
| Noctuidae     | <i>Diarsia rubi</i>           | Generalist           | 28–33             | 0.14 (0.18)                                   | 0.14 (0.18)                                   |
| Noctuidae     | <i>Eremobia ochroleuca</i>    | Open                 | 34–37             | –0.61 (0.35)                                  | –0.61 (0.35)                                  |
| Noctuidae     | <i>Euplexia lucipara</i>      | Generalist           | 32–36             | –0.21 (0.28)                                  | –0.21 (0.28)                                  |
| Noctuidae     | <i>Eupsilia transversa</i>    | Forest/Edge          | 32–42             | 0.18 (0.22)                                   | 0.14 (0.26)                                   |

| <b>Family</b> | <b>Species</b>                | <b>Main habitat*</b> | <b>Wing span*</b> | <b>DAR<sub>slope 1</sub> (SE)<sup>†</sup></b> | <b>DAR<sub>slope 2</sub> (SE)<sup>†</sup></b> |
|---------------|-------------------------------|----------------------|-------------------|-----------------------------------------------|-----------------------------------------------|
| Noctuidae     | <i>Gortyna flavago</i>        | Edge/Open            | 35–40             | –0.12 (0.26)                                  | –0.12 (0.26)                                  |
| Noctuidae     | <i>Graphiphora augur</i>      | Open                 | 35–42             | 0.28 (0.25)                                   | 0.13 (0.27)                                   |
| Noctuidae     | <i>Herminia nemoralis</i>     | Forest/Edge          | 24–28             | 0.19 (0.38)                                   | –0.91 (0.58)                                  |
| Noctuidae     | <i>Hoplodrina alsines</i>     | Edge/Open            | 28–34             | –0.19 (0.15)                                  | –0.19 (0.15)                                  |
| Noctuidae     | <i>Hoplodrina blanda</i>      | Forest/Edge          | 28–33             | –0.37 (0.45)                                  | –0.52 (0.47)                                  |
| Noctuidae     | <i>Hydraecia micacea</i>      | Open                 | 28–40             | –0.22 (0.24)                                  | –0.22 (0.24)                                  |
| Noctuidae     | <i>Hypena proboscidalis</i>   | Forest/Edge          | 27–38             | –0.43 (0.22)                                  | –0.43 (0.22)                                  |
| Noctuidae     | <i>Lacanobia oleracea</i>     | Forest/Edge          | 34–40             | –0.30 (0.18)                                  | –0.30 (0.18)                                  |
| Noctuidae     | <i>Lacanobia thalassina</i>   | Forest/Edge          | 23–38             | 0.19 (0.24)                                   | 0.19 (0.24)                                   |
| Noctuidae     | <i>Luperina testacea</i>      | Open                 | 30–40             | –0.33 (0.17)                                  | –0.33 (0.17)                                  |
| Noctuidae     | <i>Mesapamea secalis</i>      | Edge/Open            | 29–33             | –0.22 (0.15)                                  | –0.22 (0.15)                                  |
| Noctuidae     | <i>Mesoligia literosa</i>     | Open                 | 25–30             | –1.29 (0.51)                                  | –1.29 (0.51)                                  |
| Noctuidae     | <i>Mythimna ferrago</i>       | Open                 | 35–42             | –0.18 (0.22)                                  | –0.18 (0.22)                                  |
| Noctuidae     | <i>Mythimna impura</i>        | Open                 | 30–34             | 0.04 (0.14)                                   | 0.04 (0.14)                                   |
| Noctuidae     | <i>Noctua comes</i>           | Generalist           | 37–49             | –0.12 (0.18)                                  | –0.12 (0.18)                                  |
| Noctuidae     | <i>Noctua janthina</i>        | Forest/Edge          | 44–52             | –0.10 (0.24)                                  | –0.10 (0.24)                                  |
| Noctuidae     | <i>Noctua pronuba</i>         | Edge/Open            | 44–56             | 0.07 (0.19)                                   | 0.07 (0.19)                                   |
| Noctuidae     | <i>Ochropleura plecta</i>     | Forest/Edge          | 25–30             | –0.20 (0.38)                                  | –0.32 (0.40)                                  |
| Noctuidae     | <i>Oligia fasciuncula</i>     | Generalist           | 22–26             | –1.03 (0.37)                                  | –1.03 (0.37)                                  |
| Noctuidae     | <i>Oligia latruncula</i>      | Generalist           | 22–27             | –0.57 (0.36)                                  | –0.57 (0.36)                                  |
| Noctuidae     | <i>Oligia versicolor</i>      | Edge                 | 23–28             | –1.41 (0.32)                                  | –1.41 (0.32)                                  |
| Noctuidae     | <i>Omphaloscelis lunosa</i>   |                      | 32–38             | 0.24 (0.37)                                   | 0.24 (0.37)                                   |
| Noctuidae     | <i>Orthosia gothica</i>       | Forest/Edge          | 30–38             | 0.05 (0.19)                                   | 0.05 (0.19)                                   |
| Noctuidae     | <i>Orthosia incerta</i>       | Forest/Edge          | 35–42             | –0.39 (0.36)                                  | –0.39 (0.36)                                  |
| Noctuidae     | <i>Paradiarsia glareosa</i>   | Open                 | 32–38             | 0.52 (0.22)                                   | 0.52 (0.22)                                   |
| Noctuidae     | <i>Phlogophora meticulosa</i> | Edge/Open            | 47–53             | 0.09 (0.17)                                   | 0.09 (0.17)                                   |
| Noctuidae     | <i>Polia nebulosa</i>         | Forest/Edge          | 43–52             | 0.39 (0.27)                                   | 0.39 (0.27)                                   |
| Noctuidae     | <i>Xanthia icteritia</i>      | Forest/Edge          | 30–35             | –0.07 (0.24)                                  | –0.07 (0.24)                                  |
| Noctuidae     | <i>Xanthia togata</i>         | Forest/Edge          | 30–35             | 0.79 (0.34)                                   | 0.46 (0.48)                                   |
| Noctuidae     | <i>Xestia baja</i>            | Forest/Edge          | 35–40             | 0.30 (0.17)                                   | 0.30 (0.17)                                   |
| Noctuidae     | <i>Xestia c-nigrum</i>        | Open                 | 35–42             | –0.48 (0.27)                                  | –0.48 (0.27)                                  |

| <b>Family</b> | <b>Species</b>             | <b>Main habitat*</b> | <b>Wing span*</b> | <b>DAR<sub>slope 1</sub> (SE)<sup>†</sup></b> | <b>DAR<sub>slope 2</sub> (SE)<sup>†</sup></b> |
|---------------|----------------------------|----------------------|-------------------|-----------------------------------------------|-----------------------------------------------|
| Noctuidae     | <i>Xestia sexstrigata</i>  | Open                 | 35–40             | –0.25 (0.17)                                  | –0.25 (0.17)                                  |
| Noctuidae     | <i>Xestia triangulum</i>   | Generalist           | 36–46             | –0.04 (0.18)                                  | –0.04 (0.18)                                  |
| Noctuidae     | <i>Xestia xanthographa</i> | Edge/Open            | 30–38             | –0.04 (0.09)                                  | –0.04 (0.09)                                  |
| Notodontidae  | <i>Phalera bucephala</i>   | Forest/Edge          | 50–68             | 0.32 (0.31)                                   | 0.32 (0.31)                                   |
| Notodontidae  | <i>Pterostoma palpina</i>  | Forest               | 42–50             | –0.24 (0.26)                                  | –0.24 (0.26)                                  |
| Notodontidae  | <i>Ptilodon capucina</i>   | Forest/Edge          | 40–45             | 0.09 (0.22)                                   | 0.09 (0.22)                                   |

\*Data from <http://ukmoths.org.uk/>.

<sup>†</sup>Lepidopteran sampling was performed with a similar trap rotation as for the U.S. study (SI Table 4), but with a larger sampling effort. Trapping in the United Kingdom study was performed during a longer season (May–November) and with a higher intensity (three times within a trap week). However, truncated sampling periods that include only June and August normally trap most of the fauna (1). This is also reflected in the fact that sampling efficiency was quite similar among the two studies (88% and 81% of true species richness), as estimated with EstimateS (2).

#### References

1. Thomas AW, Thomas GM (1994) *J Lepid Soc* 48:85–105.
2. Colwell RK (2004) EstimateS 7.00. Statistical Estimation of Species Richness and Shared Species from Samples (University of Connecticut, Storrs, CT).
